# Supplementary material
Source: PubMed Central journal article supplement (PMC10167596)
Supplement: jamapediatr-e230799-s001.pdf [file jamapediatr-e230799-s001.pdf]

## Data Sharing Statement

Nugent. Effect Measure Modification by Birth Weight on the Association Between Overweight or Obesity and Hypertension in Children and Adolescents. *JAMA Pediatr*. Published May 08, 2023. doi:10.1001/jamapediatrics.2023.0799

### Data

**Data available:** No

### Additional Information

**Explanation for why data not available:** Data used in this study are derived from NHANES, a publicly available database.
